# Supplementary material
Source: PubMed Central journal article supplement (PMC5810964)
Supplement: NIHMS937935-supplement-1.pdf [file NIHMS937935-supplement-1.pdf]

**Cell Reports, Volume 22**

**Supplemental Information**

**A Long Cytoplasmic Loop Governs  
the Sensitivity of the Anti-viral Host  
Protein SERINC5 to HIV-1 Nef**

**Weiwei Dai, Yoshiko Usami, Yuanfei Wu, and Heinrich Göttlinger**

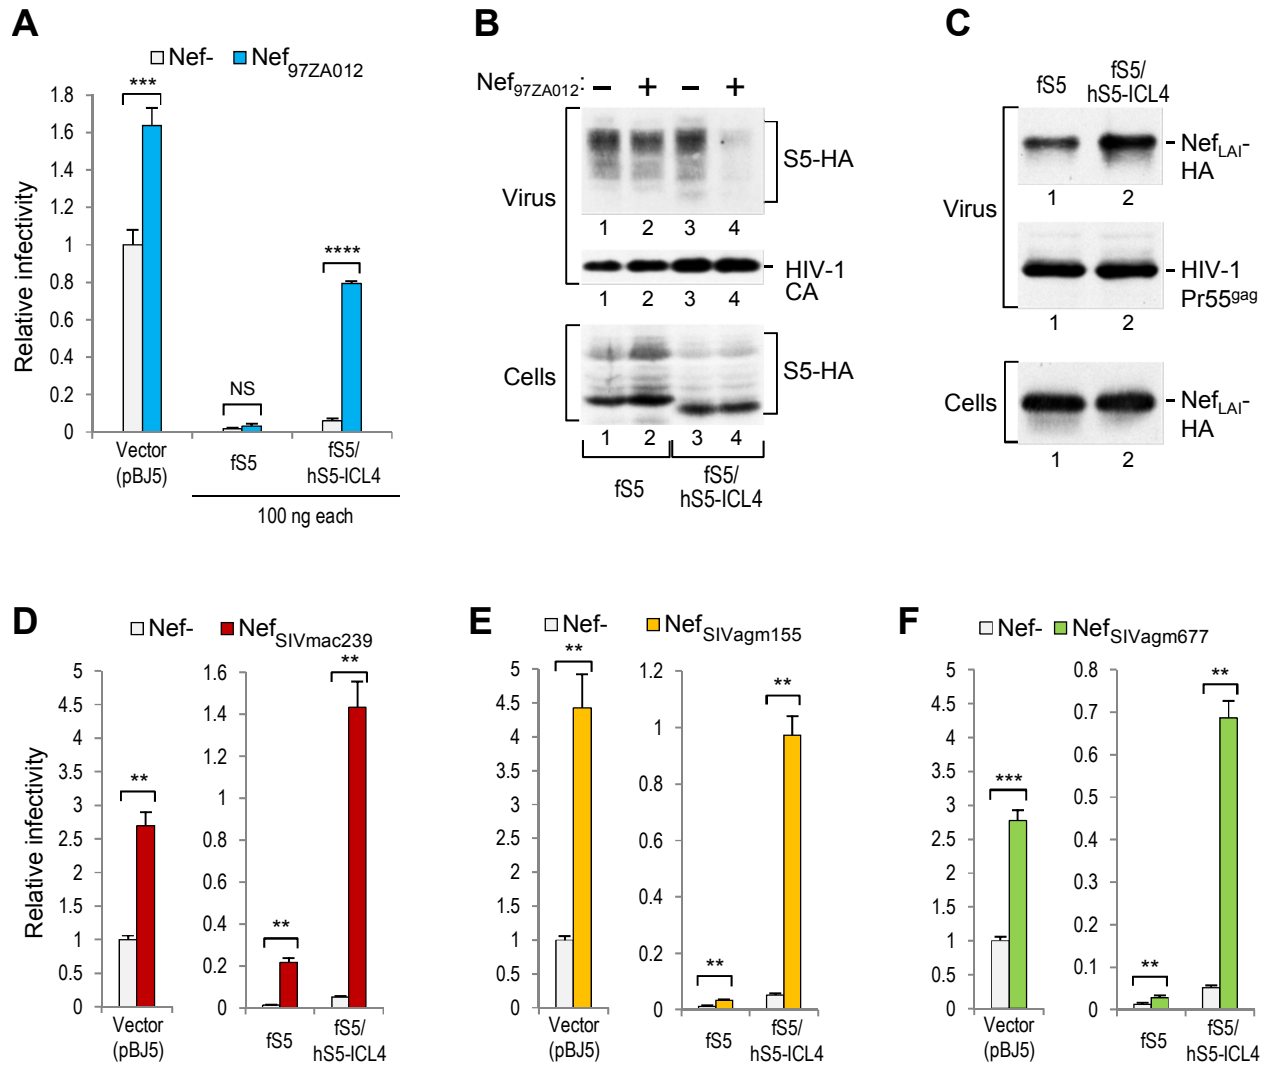

**Figure S1 (related to Figure 2).** The ICL4 of human SERINC5 confers sensitivity to widely divergent Nefs.

- (A) The inhibitory effect of frog SERINC5 on HIV-1 infectivity is resistant to HIV-1 subtype C Nef<sub>97ZA012</sub> but becomes sensitive in the presence of the ICL4 of human SERINC5.
- (B) Nef<sub>97ZA012</sub> does not affect the incorporation of frog SERINC5 into Nef<sup>-</sup> HIV-1 virions but strongly inhibits the incorporation of a chimeric version that harbors the ICL4 of human SERINC5.
- (C) A Nef<sub>LAI</sub> mutant unable to counteract SERINC5 (LL<sub>164,165</sub>AA) is more abundantly incorporated into HIV-1 virions produced in the presence of frog SERINC5 bearing the ICL4 of human SERINC5. The virions lacked protease to prevent the cleavage of Nef.
- (D-F) Effects of SIV Nef proteins on the inhibition of HIV-1 infectivity by frog SERINC5 and by a version that harbors the ICL4 of human SERINC5.

The bar graphs represent the mean + SD from 3 biological replicates.

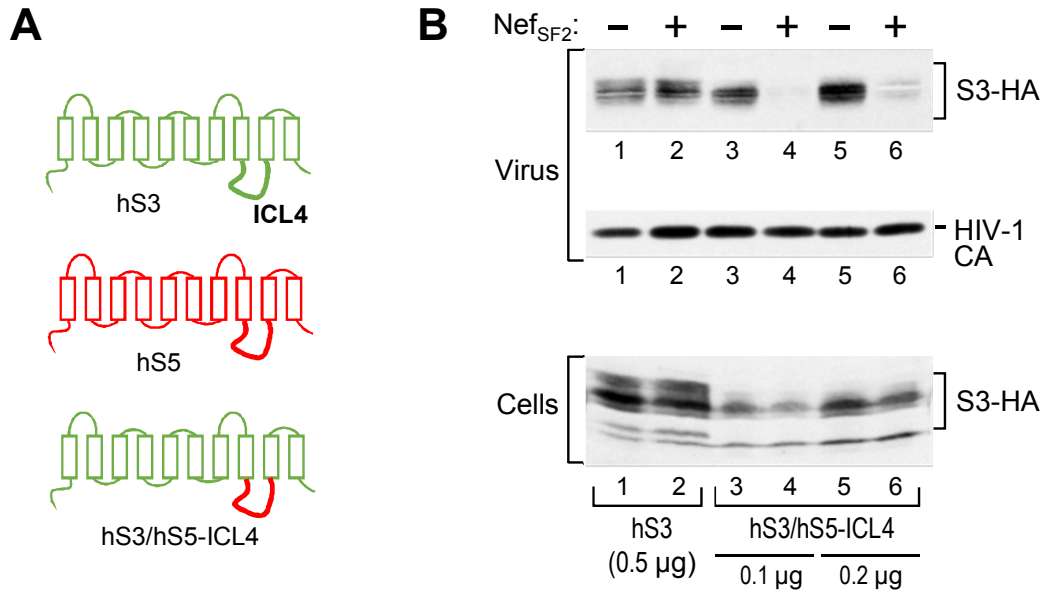

**Figure S2 (related to Figure 2).** Human SERINC3 acquires sensitivity to Nef<sub>SF2</sub> in the presence of the ICL4 of human SERINC5.

(A) Schematic illustration of the parental human SERINC proteins and of the chimera examined.

(B) Western blots showing that Nef<sub>SF2</sub> inhibits the incorporation of human SERINC3 into Nef<sup>-</sup> HIV-1 virions only upon replacement of its ICL4 by that of human SERINC5.

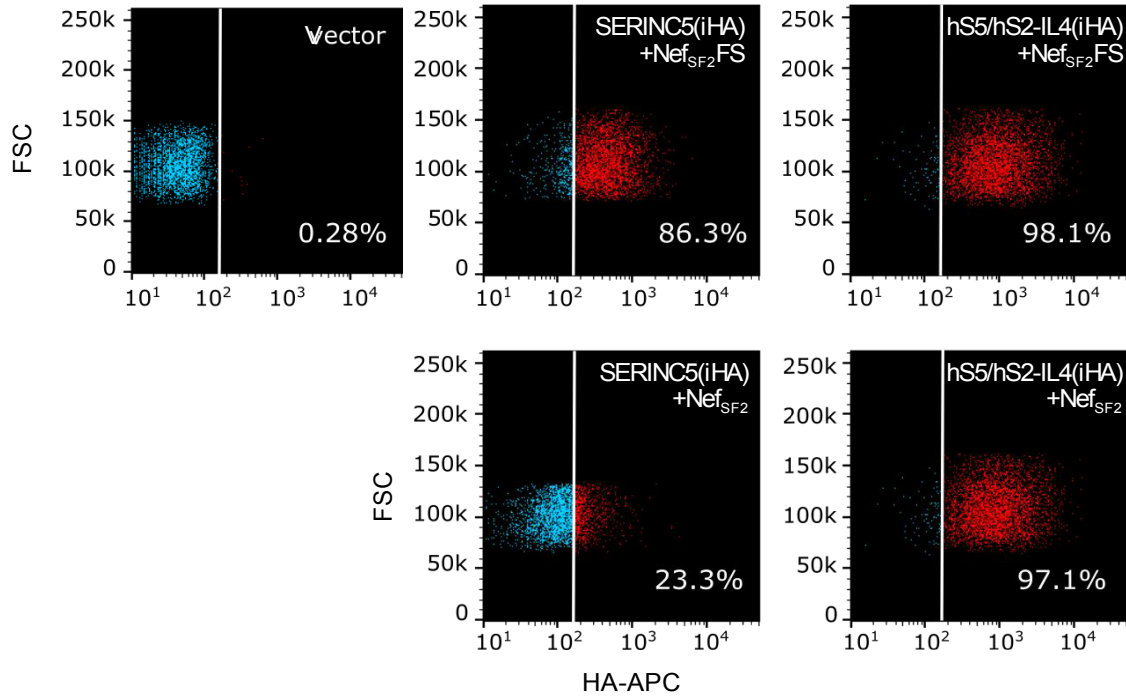

**Figure S3 (related to Figure 4).** Swapping the ICL4 of human SERINC5 for that of human SERINC2 confers resistance to down-regulation by Nef<sub>SF2</sub>. JurkatTAg S5 <sup>-/-</sup> cells stably expressing SERINC5(iHA) or the S5/hS2-ICL4(iHA) chimera together with Nef<sub>SF2</sub> were surface-stained with anti-HA antibody and analyzed by flow cytometry. Per cent fractions of cells expressing SERINC5(iHA) or the S5/hS2-ICL4(iHA) chimera on the surface are indicated.

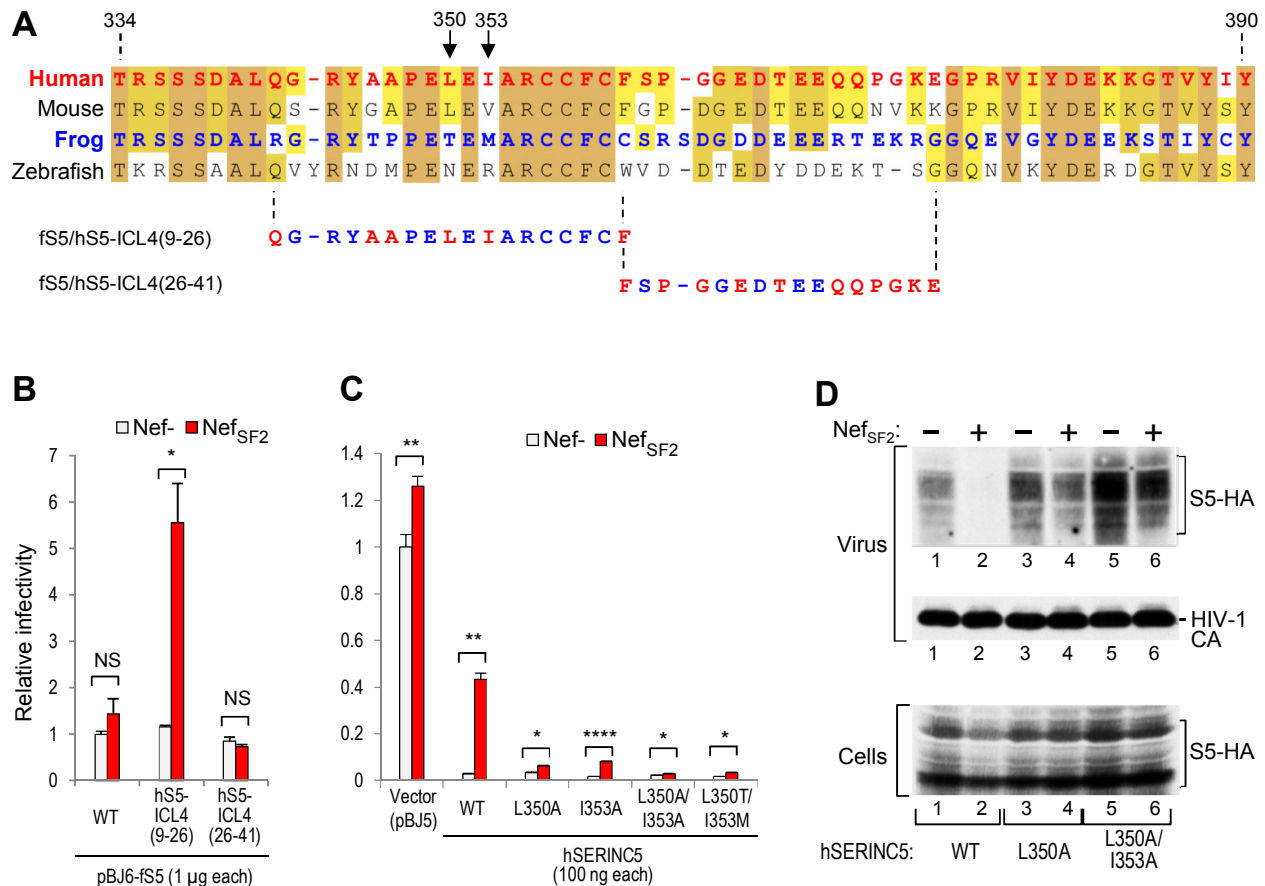

**Figure S4 (related to Figures 2 through 4).** Point mutations in the ICL4 of human SERINC5 confer resistance to Nef.

- (A) Alignment of the ICL4 regions of Nef-sensitive (human, mouse) and Nef-insensitive (frog, zebrafish) SERINC5 proteins, and schematic illustration of intra-ICL4 chimeras examined.
- (B) The transfer of human SERINC5 ICL4 residues 9-26, but not of residues 26-41, to the ICL4 of frog SERINC5 increases its sensitivity to Nef<sub>SF2</sub>.
- (C) Point mutations targeting small hydrophobic amino acids within the ICL4 of human SERINC5 reduce the sensitivity of its effect on HIV-1 infectivity to Nef<sub>SF2</sub>.
- (D) Western blots showing the effects of Nef<sub>SF2</sub> on the incorporation of WT human SERINC5 and of ICL4 mutants into Nef<sup>-</sup> HIV-1 virions.
- The bar graphs represent the mean + SD from 3 biological replicates.

## SUPPLEMENTAL EXPERIMENTAL PROCEDURES

**Plasmids.** The *env*- and *nef*-deficient HIV-1 provirus HXB/Env<sup>-</sup>/Nef<sup>-</sup>, the pSVIIIenv-based plasmids expressing Env<sub>HXB2</sub> or Env<sub>JRFL</sub>, the pBJ5-based expression plasmids for the Nef proteins of HIV-1<sub>SF2</sub>, HIV-1<sub>97ZA012</sub>, and SIV<sub>mac239</sub>, the *nef*-deficient control plasmid pNef<sub>FS</sub>, and the pBJ5-based expression plasmids for human SERINC3-HA, human SERINC5, and human SERINC5-HA have been described (Dorfman et al., 2002; Helseth et al., 1990; Pizzato et al., 2007; Usami et al., 2015). A pBJ6-based expression plasmid for human SERINC5 was kindly provided by M. Pizzato. The *nef* genes of SIV<sub>agm155</sub> and SIV<sub>agm677</sub> were amplified from proviral clones and inserted into pBJ5. The coding sequences for mouse, frog, and zebrafish SERINC5 were amplified from cloned cDNAs purchased from Dharmacon (GenBank: BC062131, XM\_002940195, and BC044159). DNAs encoding mutant and chimeric proteins without or with C-terminal HA tags were generated using an overlap extension PCR method (Horton et al., 1989) and inserted into pBJ5 or pBJ6 downstream of a Kozak sequence. The fS5/hS5-ICL4 chimera has residues 342-390 of frog SERINC5 (fS5) replaced by residues 342-389 of human SERINC5 (hS5). The intra-ICL4 chimeras fS5/hS5-ICL4(9-26) and fS5/hS5-ICL4(26-41) have residues 342-359 and 359-375 of frog SERINC5 replaced by the corresponding residues of human SERINC5. The hS5/fS5-ICL4 chimera has residues 342-389 of human SERINC5 replaced by residues 342-390 of frog SERINC5. The hS5/hS2-ICL4 chimera has residues 334-389 of human SERINC5 replaced by residues 343-388 of human SERINC2 (hS2). The hS3/hS5-ICL4 chimera has residues 358-404 of human SERINC3 (hS3) replaced by residues 335-389 of human SERINC5.

**Retroviral vectors.** The coding sequence for SERINC5(iHA) (Usami et al., 2015) preceded by a Kozak sequence was amplified from pBJ5-SERINC5(iHA) and inserted into the retroviral vector MSCVpuro (Clontech). Additionally, a version of the hS5/hS2-ICL4 chimera that harbors an internal HA tag at the same position as SERINC5(iHA) was cloned into MSCVpuro. The coding sequence for HIV-1 Nef<sub>SF2</sub> preceded by a Kozak sequence was cloned into MSCVhyg (Clontech), yielding MSCVhygNef<sub>SF2</sub>. A *nef*-deficient version (MSCVhygNef<sub>SF2</sub>FS) was obtained by generating a frameshift at a unique *Xho*I site in *nef*.

**Analysis of Nef incorporation.** 293T cells were co-transfected with 2 µg of the protease-deficient HIV-1 proviral construct HXB/VPR<sup>+</sup>/PR<sup>-</sup> (Bukovsky and Gottlinger, 1996), 2 µg of a pBJ5-based plasmid expressing C-terminally HA-tagged Nef<sub>LAI</sub> with a LL<sub>164,165</sub>AA mutation (Pizzato et al., 2007), and 2 µg of a pBJ5-based plasmid expressing native frog SERINC5 or a version harboring the ICL4 of human SERINC5 (fS5/hS5-ICL4). Virions released into the medium were pelleted through 20% sucrose cushions, and virus- and cell-associated proteins were detected by western blotting. The antibodies used for western blotting were 183-H12-5C against HIV-1 CA, and HA.11 (BioLegend) against the HA epitope.

**Flow cytometry.** Ectopic SERINC expression cassettes were introduced into JurkatTAG S5<sup>-/-</sup> (1) cells (Usami et al., 2015) by retroviral transduction with

MSCVpuroSERINC5(iHA) or MSCVpurohS5/hS2-ICL4(iHA). Simultaneously, the cells were transduced with the *nef*-deficient control vector MSCVhygNef<sub>SF2</sub>FS or with MSCVhygNef<sub>SF2</sub>. After selection with puromycin and hygromycin, the doubly transduced bulk cultures were surface-stained with anti-HA antibody and APC-conjugated anti-mouse IgG (Jackson ImmunoResearch). Samples were then analyzed on a BD LSR II flow cytometer.

## SUPPLEMENTAL REFERENCES

Bukovsky, A., and Gottlinger, H. (1996). Lack of integrase can markedly affect human immunodeficiency virus type 1 particle production in the presence of an active viral protease. *J Virol* 70, 6820-6825.

Dorfman, T., Popova, E., Pizzato, M., and Gottlinger, H. G. (2002). Nef enhances human immunodeficiency virus type 1 infectivity in the absence of matrix. *J Virol* 76, 6857-6862.

Helseth, E., Kowalski, M., Gabuzda, D., Olshevsky, U., Haseltine, W., and Sodroski, J. (1990). Rapid complementation assays measuring replicative potential of human immunodeficiency virus type 1 envelope glycoprotein mutants. *J Virol* 64, 2416-2420.

Horton, R. M., Hunt, H. D., Ho, S. N., Pullen, J. K., and Pease, L. R. (1989). Engineering hybrid genes without the use of restriction enzymes: gene splicing by overlap extension. *Gene* 77, 61-68.

Pizzato, M., Helander, A., Popova, E., Calistri, A., Zamborlini, A., Palu, G., and Gottlinger, H. G. (2007). Dynamin 2 is required for the enhancement of HIV-1 infectivity by Nef. *Proc Natl Acad Sci U S A* 104, 6812-6817.

Usami, Y., Wu, Y., and Gottlinger, H. G. (2015). SERINC3 and SERINC5 restrict HIV-1 infectivity and are counteracted by Nef. *Nature* 526, 218-223.
